# Supplementary material for: Brown carbon emissions from laboratory combustion of Eurasian arctic-boreal and South African savanna biomass
Source: Copernicus journal article supplement (doi:10.5194/egusphere-2025-2759), 2025-06-26
Supplement: Supplementary file 1 [file egusphere-2025-2759-supplement.pdf]

*Supplementary Information for*

**Brown carbon emissions from laboratory combustion of Eurasian  
arctic-boreal and South African savanna biomass**

## **S1 : Description of Fuels and combustion set up:**

Samples of Finnish boreal forest surface (BFS), South African savanna grass and wood (SG and SW), and four different types of peat, including commercially available peat fuel (CP), natural peatlands from Finland (FIA and FIB), subarctic permafrost area of Russia (RUS) and arctic Svalbard peat from Norway (NOR) were used in the experiments (Table S1). Details of the savanna biomasses used in this study can be found in Vakkari et al. (2025), while details regarding the NOR, RUS, FIA and FIB biomasses have been described by Schneider et al., 2024.

Savanna biomass was cultivated in the North-West University's garden in South Africa and delivered to Finland. The savanna biomass used in the study consisted of ten different species representing indigenous savanna biomass from South Africa, including: *Celtis africana*, *Searsia pyroides*, *Vachellia karroo*, *Ziziphus mucronata*, *Asparagus laricinus*, *Gymnosporia buxifolia*, *Euclea undulata*, *Senegalia caffra*, *Pavetta zeyheri*, *Vangueria infausta*, and *Zanthoxylum capense*. The savanna biomass was divided into grass and woody samples. The savanna grasses were burned in an upright position in 50 g batches without shortening or other modification of the samples. The burning samples of savanna trees were prepared as composite batches, including material from all savanna tree species for a total of 60 g. The savanna tree batches included thorns, leaves, and branches from the species. The savanna tree material was cut into smaller pieces to fit into the B and C sample holders marked in Figure S2(i).

Different sample holders were used for different biomasses in our experiments which are illustrated in Supplementary Fig. S2. Boreal forest surface (BFS) samples needed large piece of wire mesh below it on the open biomass burning setup to keep the sample intact so that it doesn't fall between the spaces on grate during long smoldering phase. BFS samples were burnt from top to bottom by placing a heating rod horizontally on top of the sample surface in order to mimick more natural progression of forest floor fires. Extra litters were present in each sample as found in a natural Finnish BFS.

Savanna and peat samples had the heating rod in the middle of the burned sample to provide more surface-area for the sample to heat up for the combustion experiment. Keeping the mass of combusted biomass same between different sample types of peat needed two different sample holder setups. CP, RUS and NOR samples were more dense and solid compared to FIA and FIB, which were more porous and fluffy in texture (Figure S2). Clam shaped (CP, Svalbard, savanna material) sample holder was used to keep the burning material close to the electrical resistor (heating rod), because during the combustion there was a possibility that burned material lost its shape and wasn't close enough to resistor to continue burning. This wasn't necessary for FIA, FIB and Russian sample types because they settled better on the heating rod. Minimal modifications were made to the samples before combustion to keep them as they were provided to us.

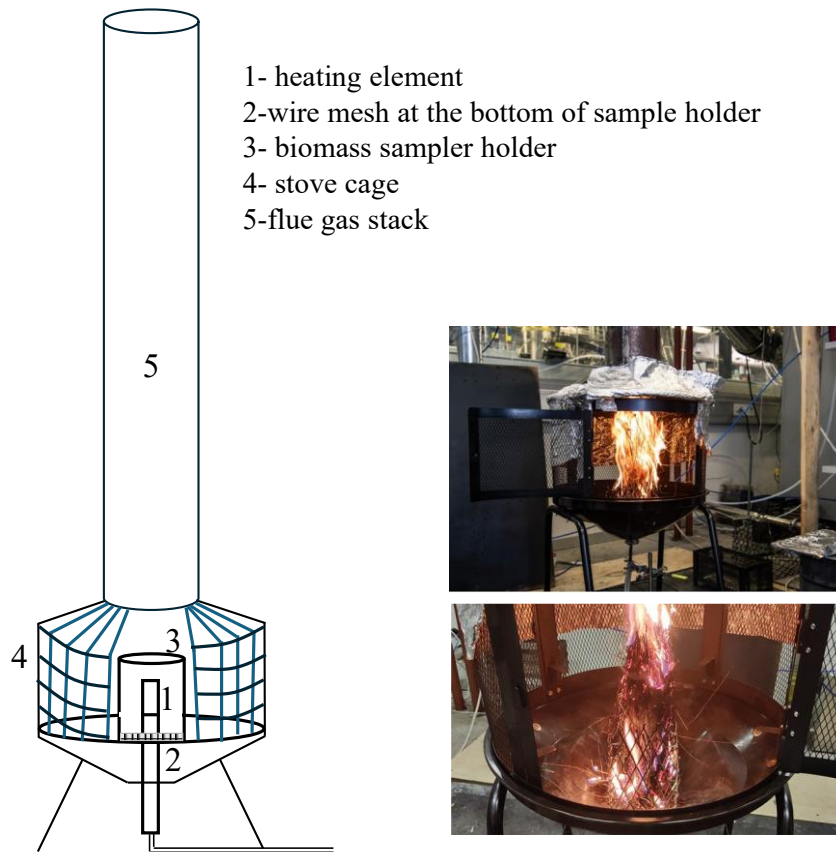

**Figure S1: Graphical representation of the combustion set up with its 5 different components along with some pictures taken during the combustion experiments**

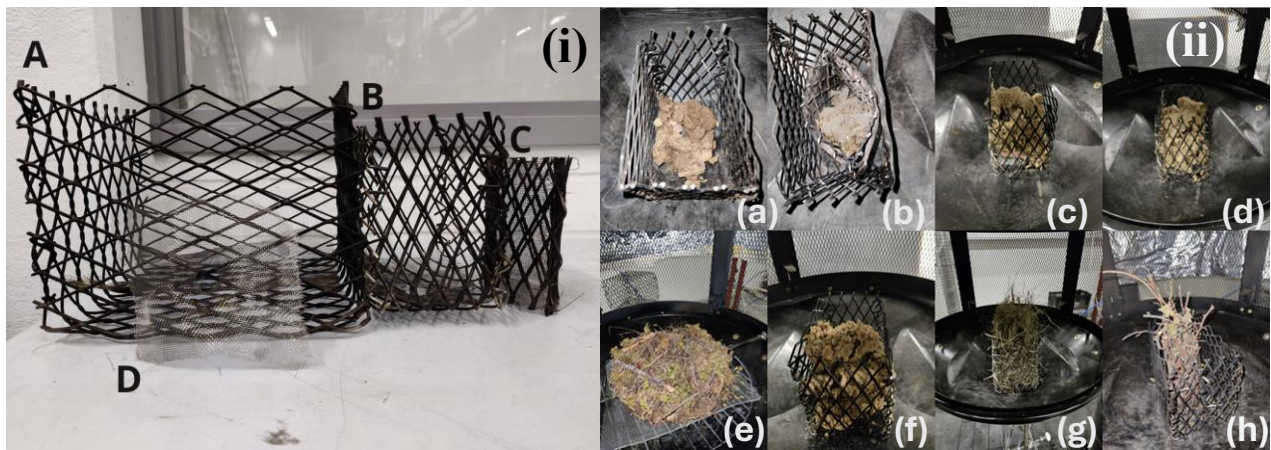

**Figure S2: Pictures of different biomass holders used for the experiments. (i) *Left*: biomass holder for BFS samples (A), biomass holders (B and C) for savanna (SG) and peat samples (CP, FIA, FIB, RUS and NOR), and wired mesh used at the bottom of the holders (D) ; (ii) *Right*: Exemplary images of different biomasses in their respective holders before combustion; (a) Russian Peat, (b) Svalbard Peat (NOR), (c-d) Finnish peatland from Lakkasuo (FIA) (e) Boreal forest surface (BFS), (f) Finnish peatland from Siikaneva (FIB), (g) savanna grass (SG) and (h) savanna wood (SW)**

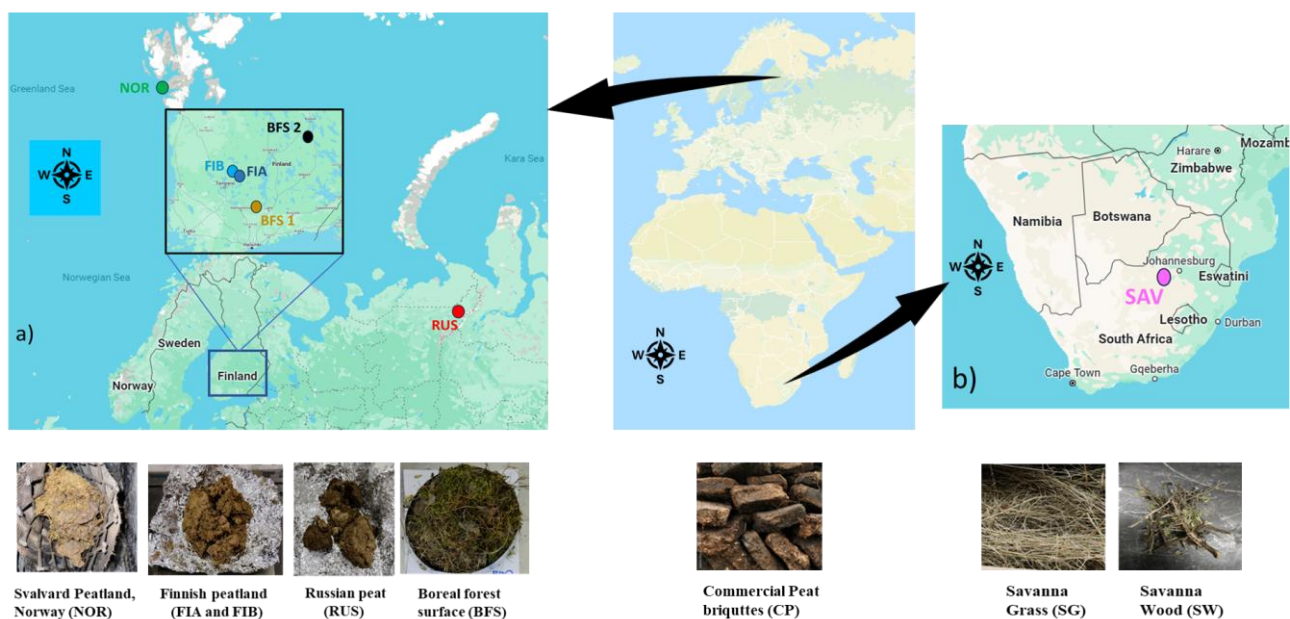

**Figure S3: Geographic locations of the (a) Northern European Biomass and (b) South African savanna biomass used for this study (© Google maps 2025)**

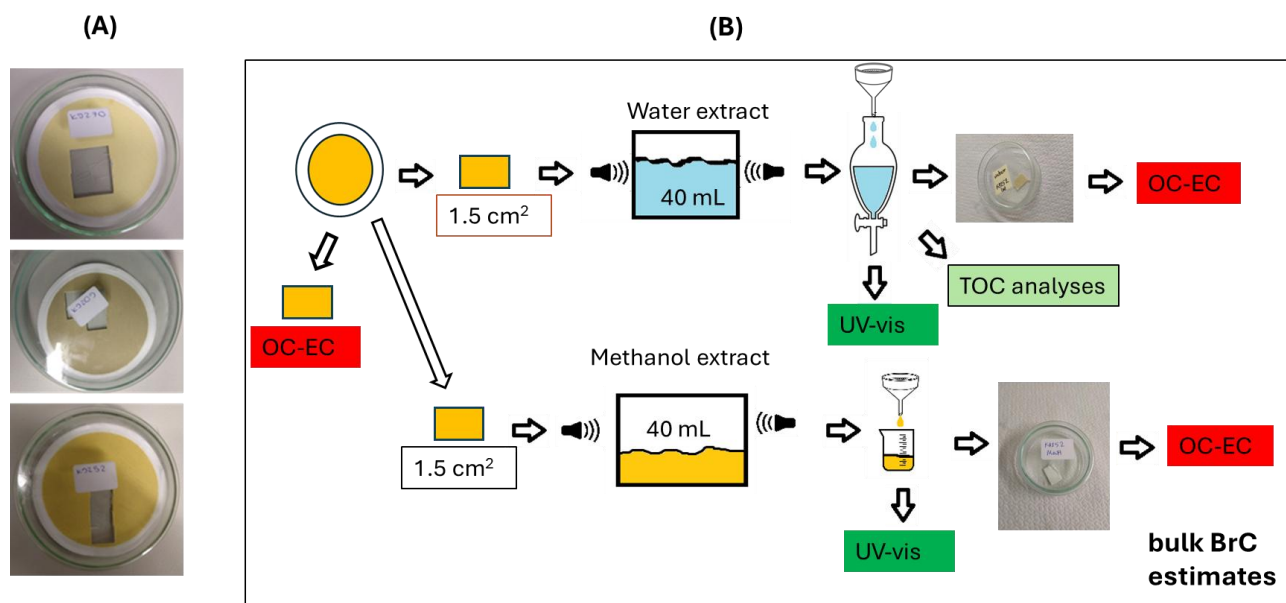

**Figure S4: (A) representative images of 90 mm Quartz fiber filters collected for different fresh BB emissions and (B) graphical schematic of the extraction process for filters collecting fresh BB emissions**

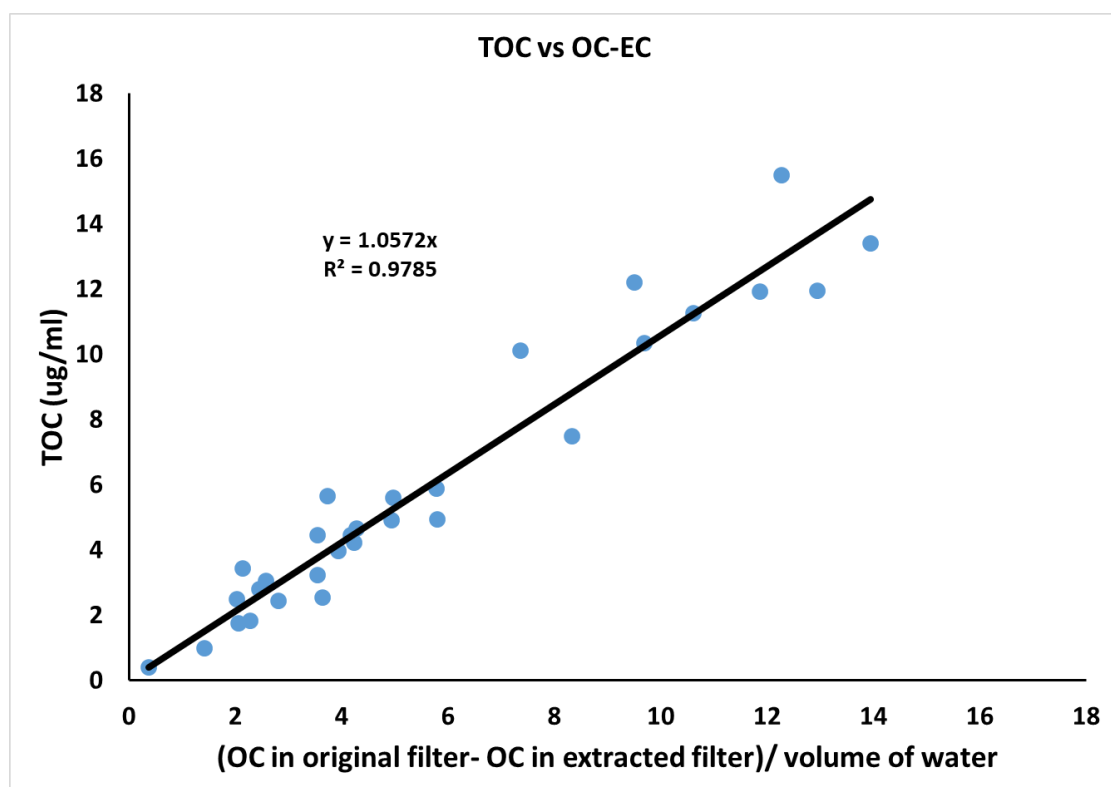

Fig. S5: Comparison between TOC and OC-EC analyzer based estimations of WSOC concentrations for fresh BB emissions

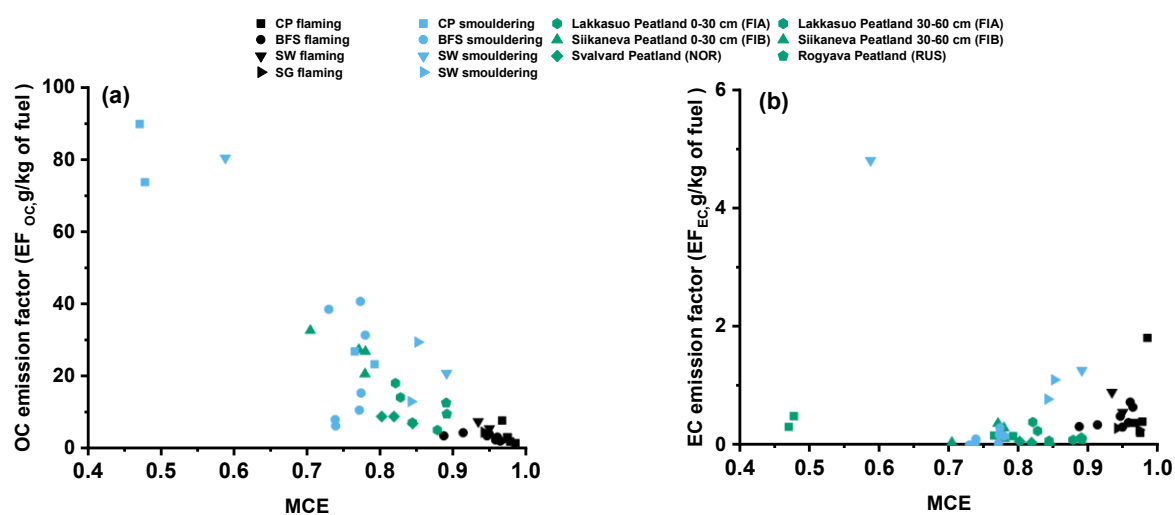

Figure S6: Dependence of  $EF_{EC}$  and  $EF_{OC}$  on MCE of the combustion

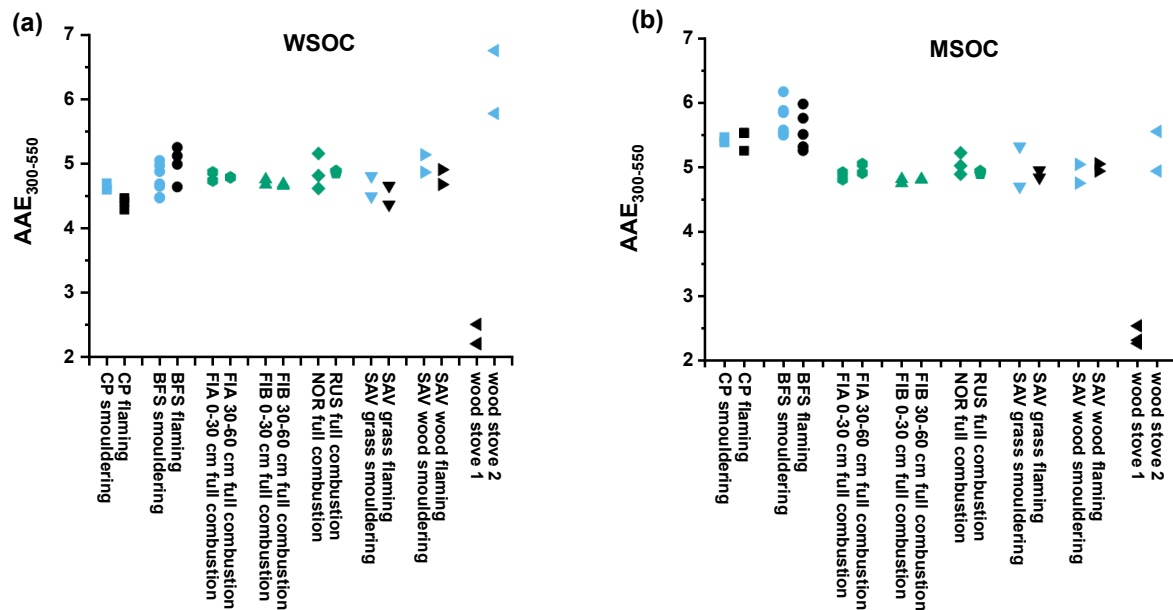

Fig. S7:  $AAE_{300-550}$  for WSOC (a) and MSOC (b) of fresh BB emissions in this study

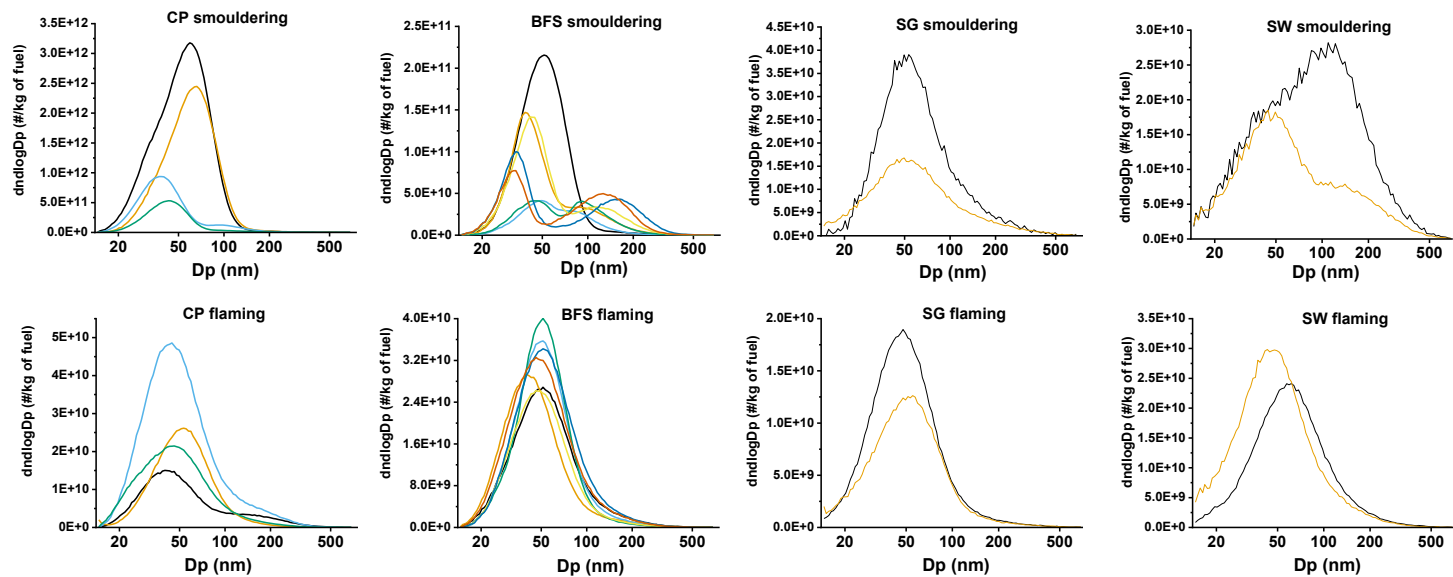

Fig. S8: particle number size distribution of different replicates of the environmental chamber experiments conducted in this study for smouldering and flaming burns of commercial peat (CP), Boreal Forest Surface (BFS), Savanna grass (SG) and savanna wood (SW)

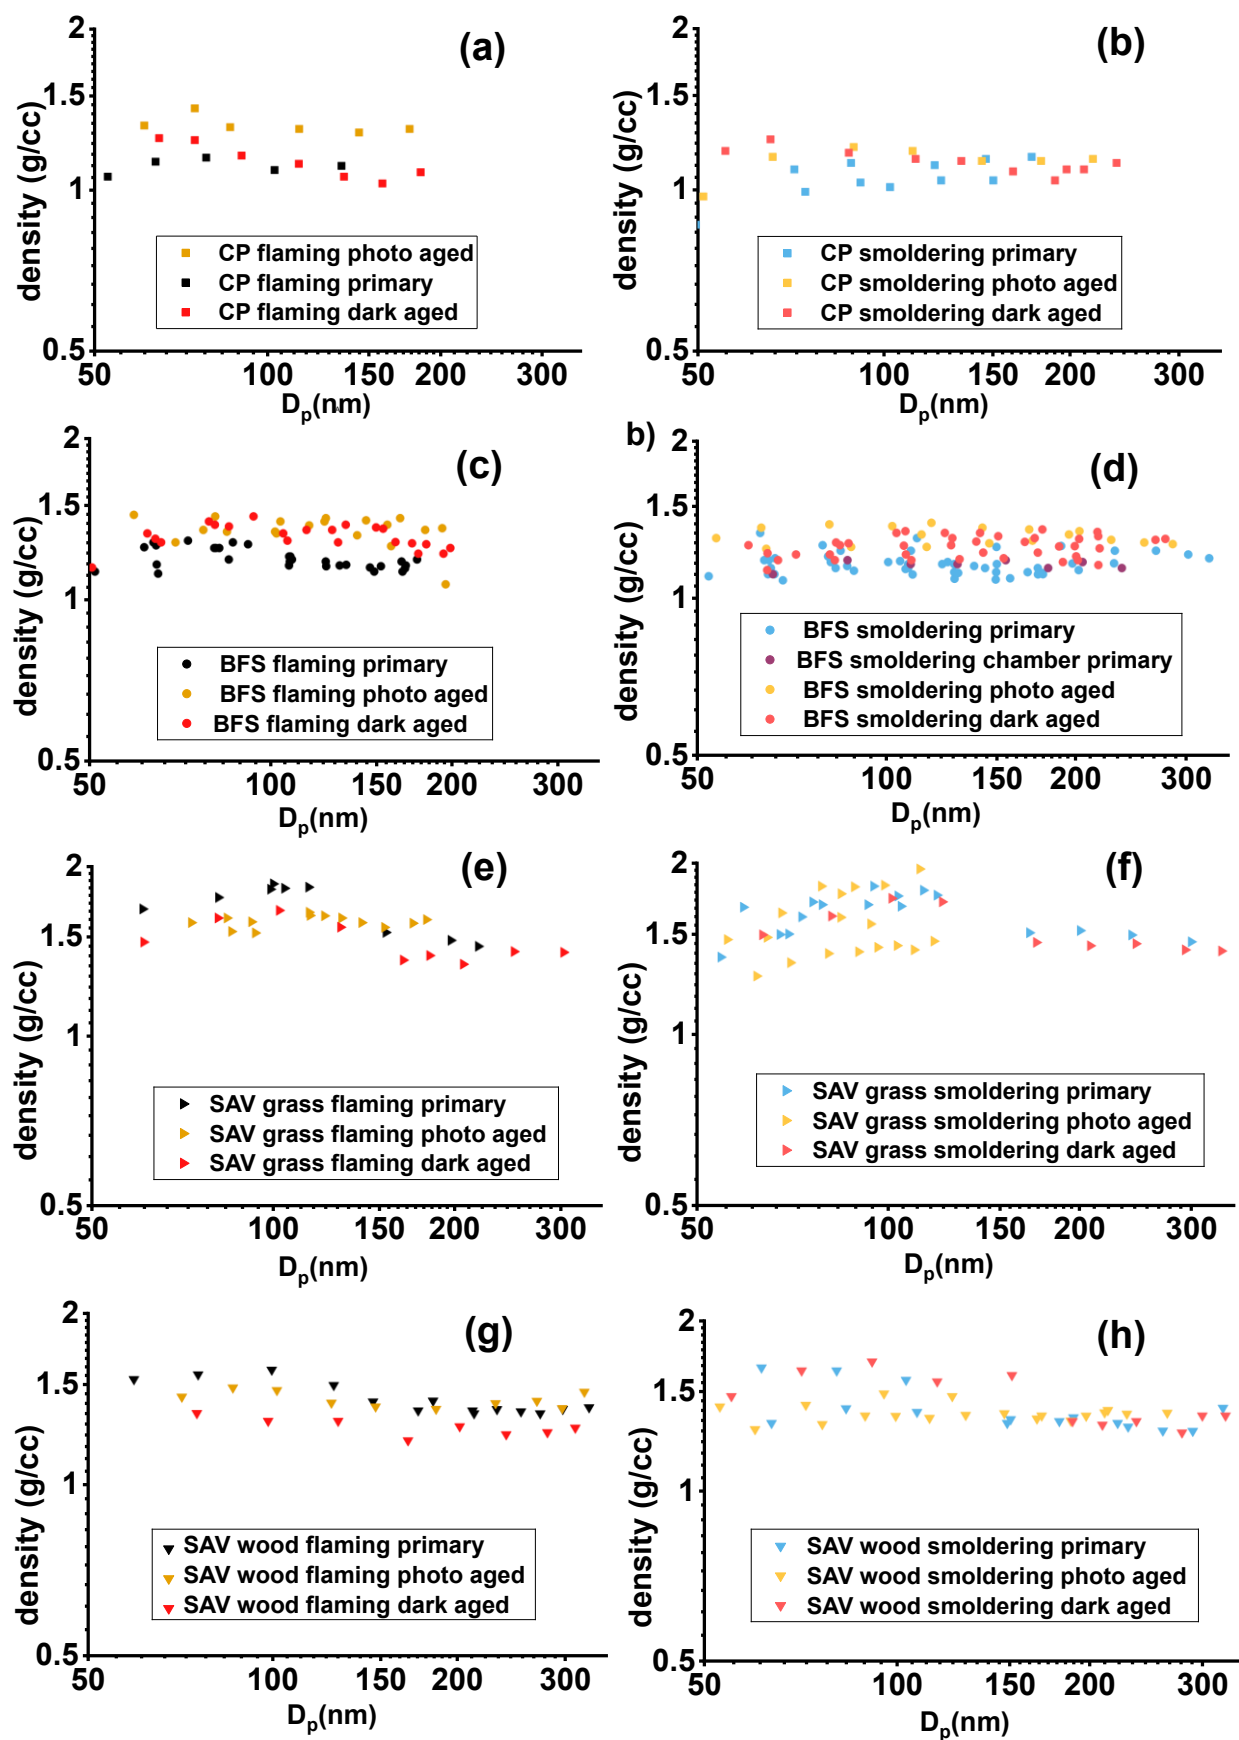

Fig. S9: particle effective densities measured by APM-SMPS



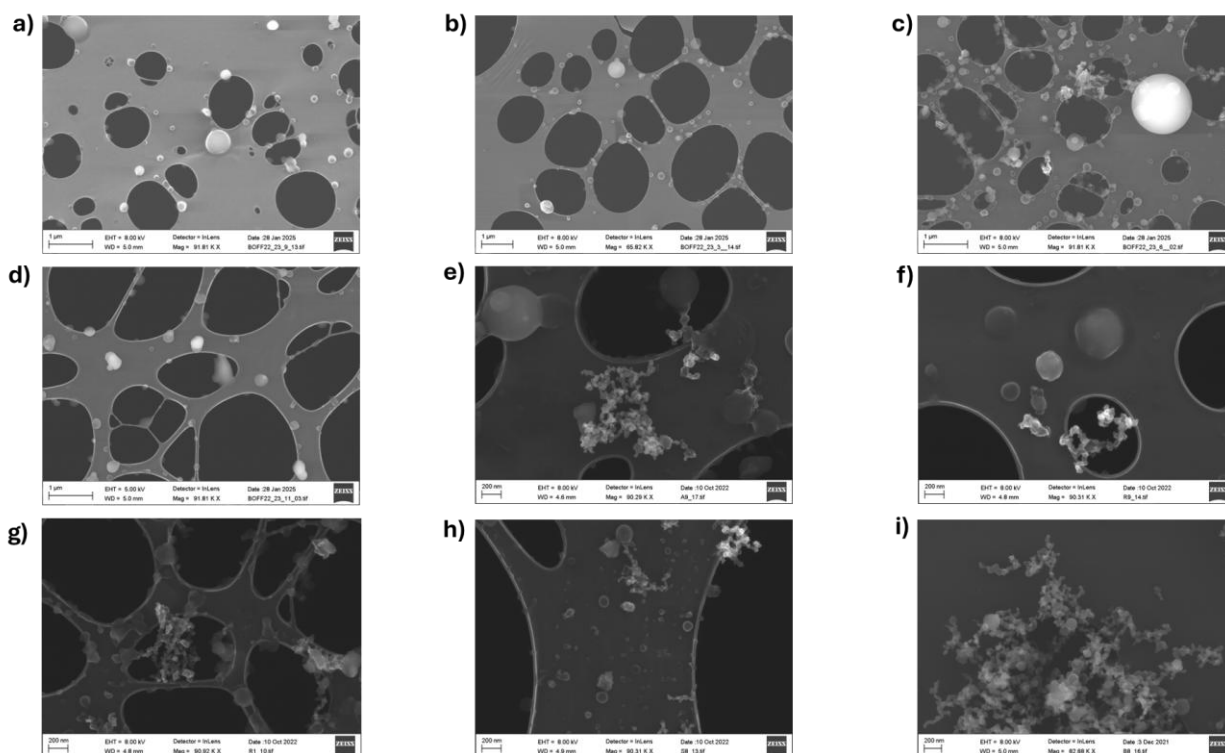

**Fig. S10: Electron microscope images of primary particles from a) CP flaming, b) CP smouldering, c) BFS flaming, d) BFS smouldering, e) SG flaming, f) SG smouldering, g) SW flaming, h) SW smouldering and i) wood stove emissions**

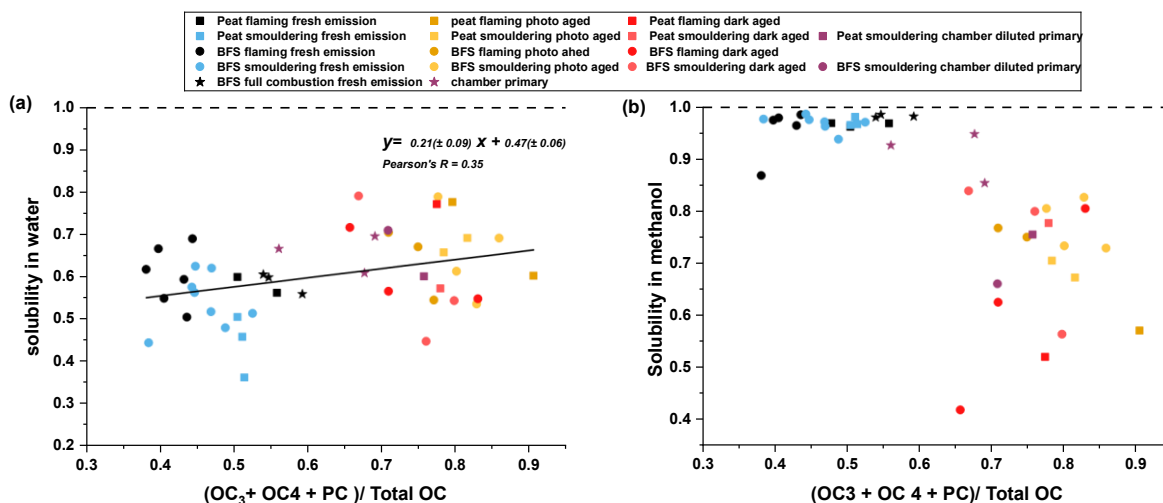

**Fig. S11: Solubility of low volatile organics (OC3, OC4 and PC) in water (a) and methanol (b) for fresh emission, chamber diluted primary emissions and photochemically and dark aged emissions in chamber for smouldering and flaming burns of CP (square) and BFS (circle) biomasses.**



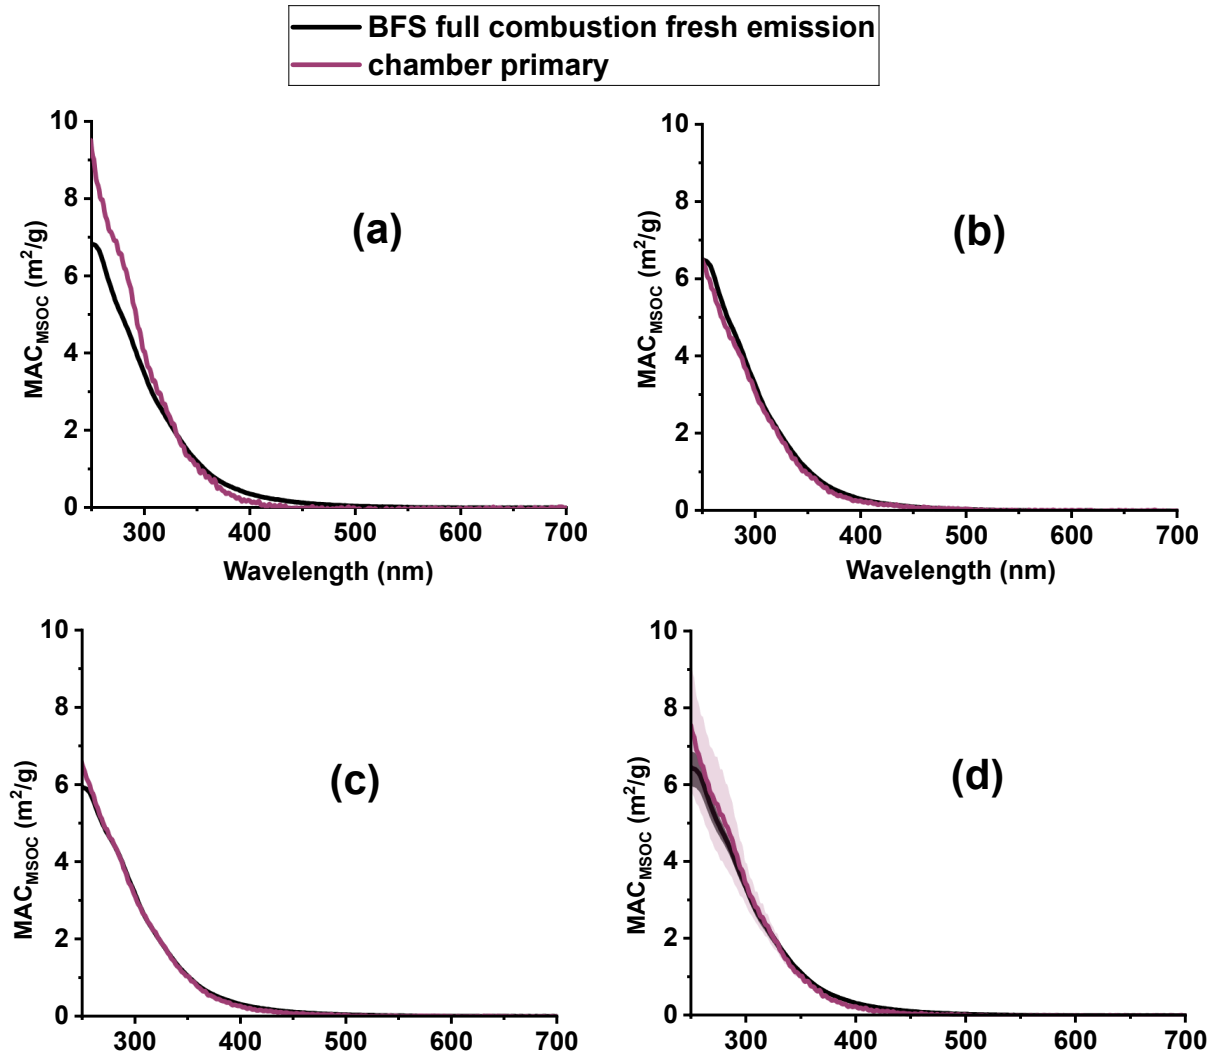

**Fig. S12: Wavelength dependence of  $MAC_{MSOC}$  for fresh emission and chamber diluted primary samples from full combustion of BFS samples. (a-c) denote three separate replicates, while (d) is the mean values (solid lines) of the three replicates and the standard deviation from mean (shaded area)**

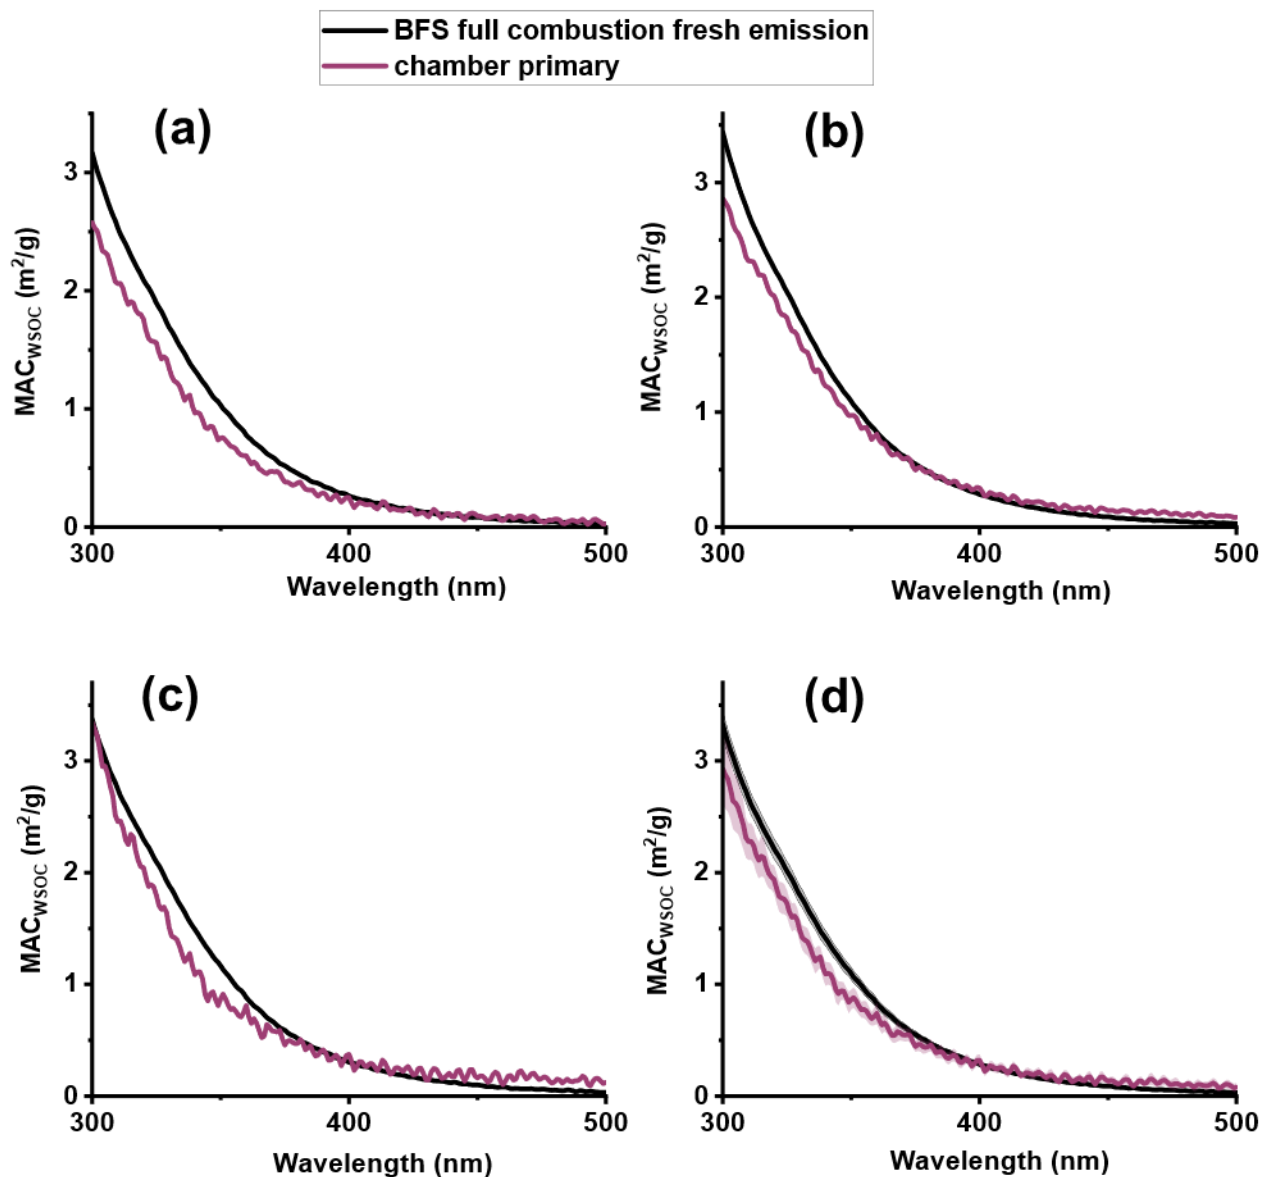

**Fig. S13: Wavelength dependence of  $MAC_{WSOC}$  for fresh emission and chamber diluted primary samples from full combustion of BFS samples. (a-c) denote three separate replicates, while (d) is the mean values (solid lines) of the three replicates and the standard deviation from mean (shaded area)**

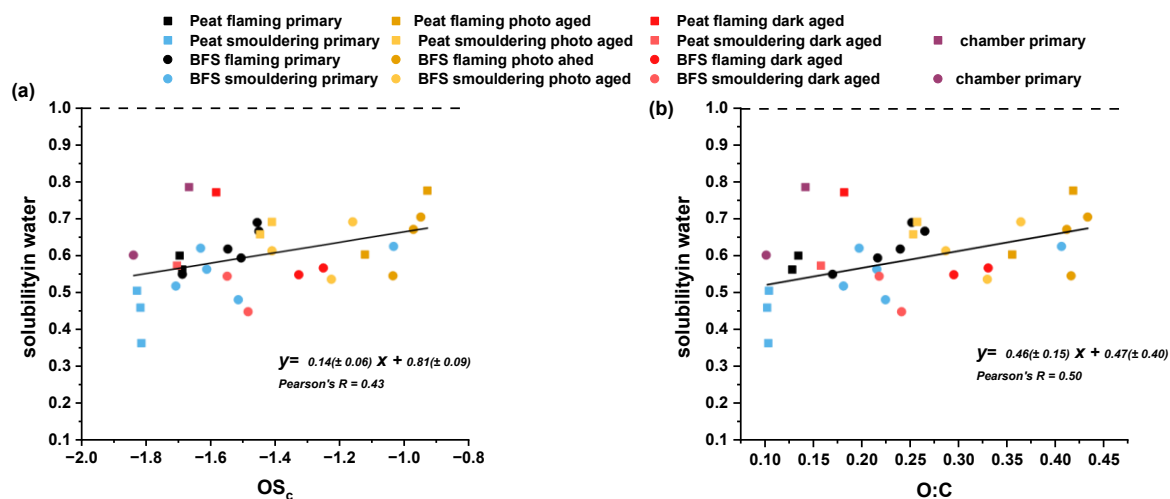

**Fig. S14:** solubility of OC in water (alternatively WSOC fraction of total OC) vs oxidation state of chamber diluted primary and aged particles (a) and O:C ratio of chamber diluted primary and aged particles (b)

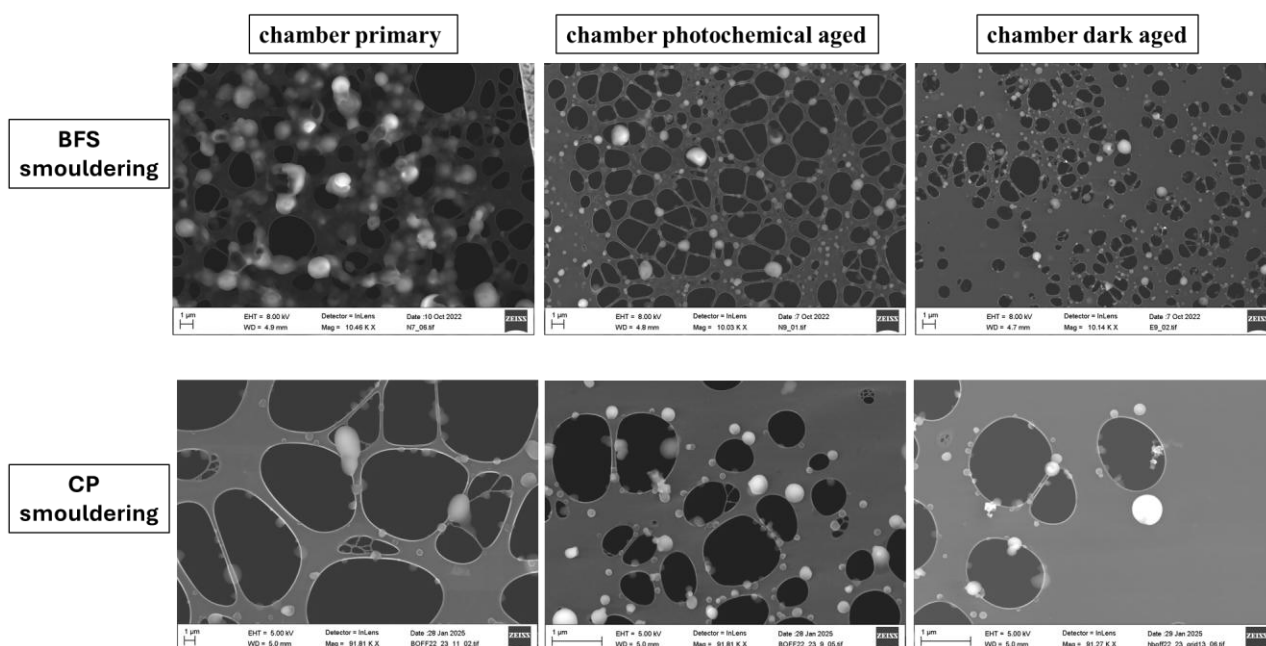

**Fig. S15:** Representative SEM images of chamber primary and oxidative aged emissions from smouldering combustion of CP and BFS. We observed higher abundance of spherical tarballs in aged samples compared to more amorphous morphology of primary emissions in the chamber.

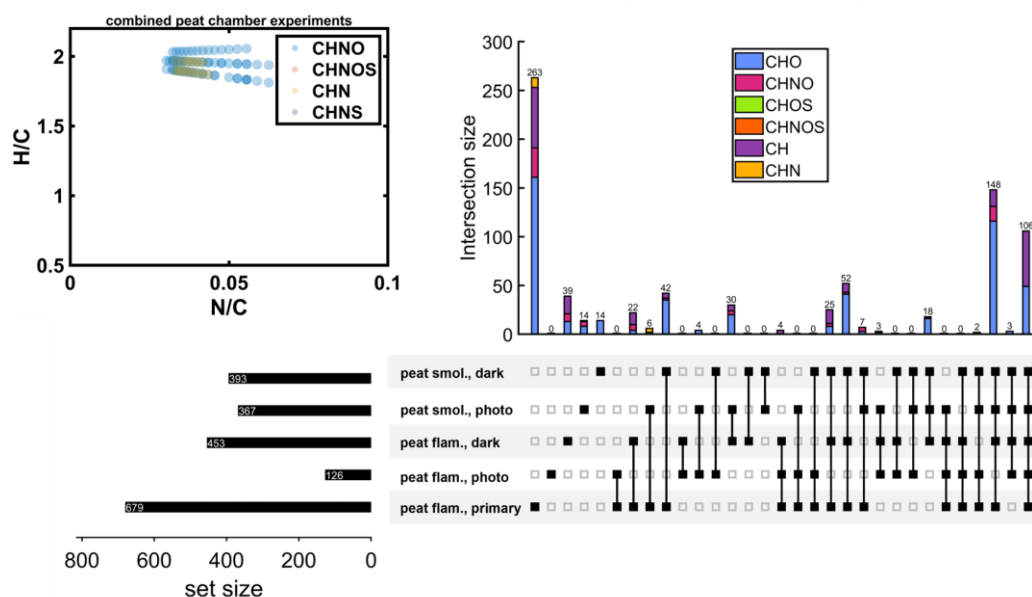

**Fig. S16:** Upset plot showing the number of unique sum formulae obtained from chamber diluted primary and aged samples from commercial peat (CP) combustions as well as the dominant chemical classes they belong to. Insufficient material on the filters collected from chamber resulted in identification of fewer chemical formulae of only highly abundant chemical groups

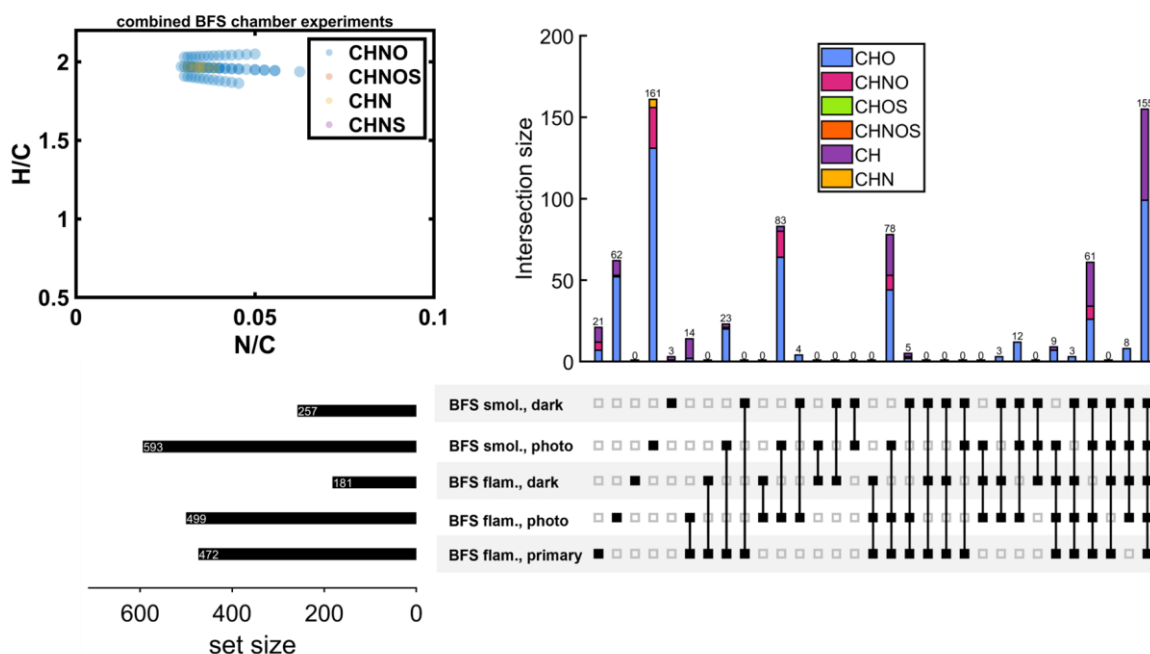

**Fig. S17:** Upset plot showing the number of unique sum formulae obtained from chamber diluted primary and aged samples from boreal forest surface (BFS) combustions as well as the dominant chemical groups they belong to. Insufficient material on the filters collected from chamber resulted in identification of fewer chemical formulae of only highly abundant chemical groups

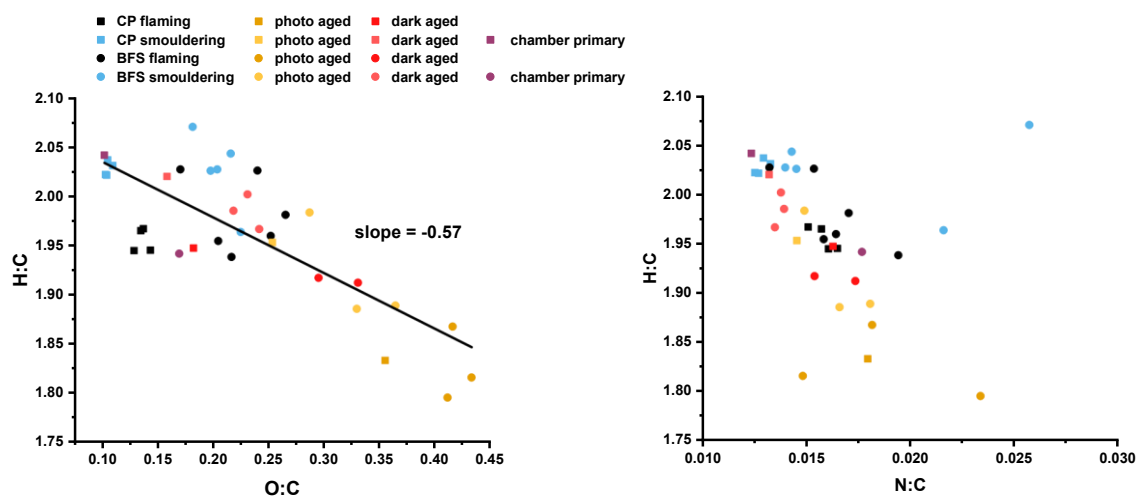

**Fig. S18: Van-Krevelen diagrams for H:C vs O:C and H:C vs N:C ratios obtained from HR-AMS from the environmental chamber for CP and BFS combustion experiments. Data obtained for primary emission of flaming (black) and smouldering (grey) burns were compared to the elemental ratios at the end of photochemical (orange for flaming emission, yellow for smouldering emissions) and dark (dark blue for flaming emissions and light blue for smouldering emissions) aging in the chamber.**

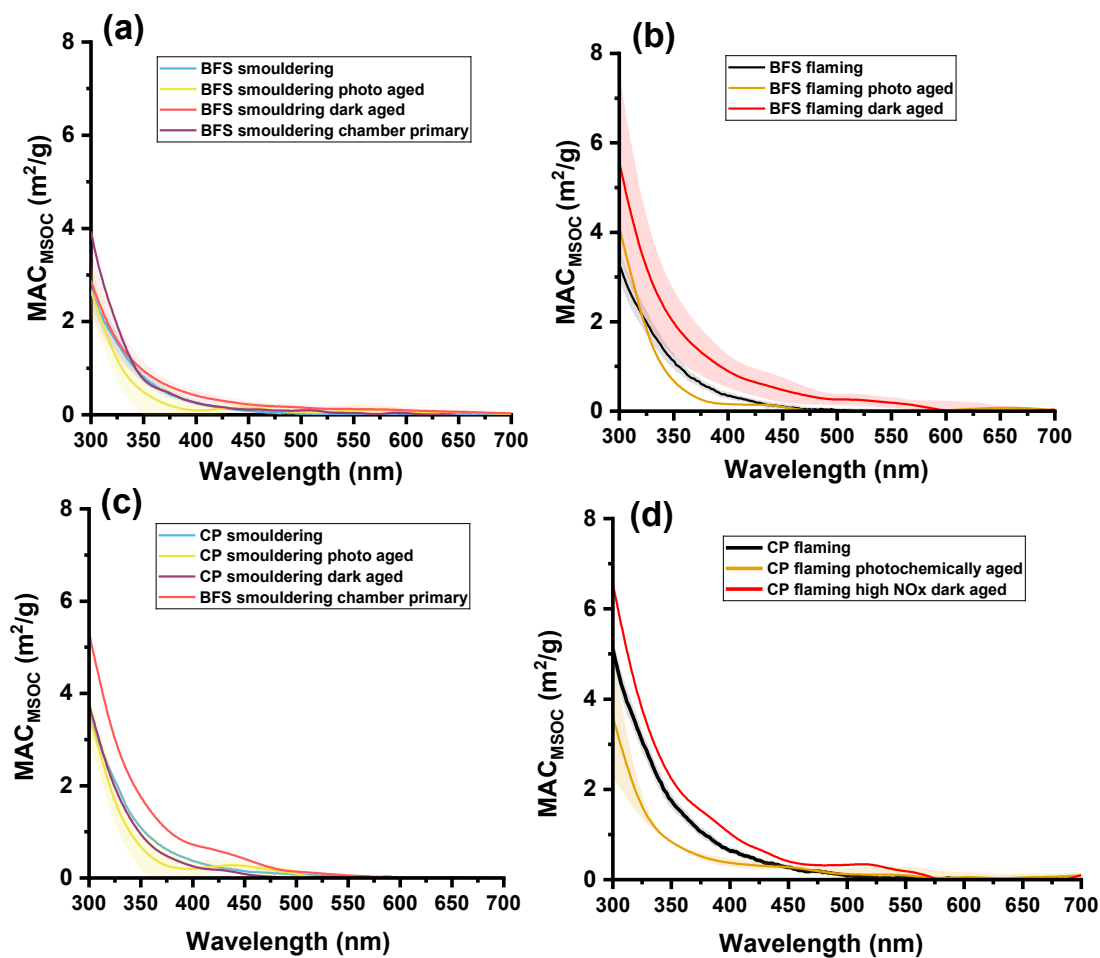

**Fig. S19: wavelength dependence of  $MAC_{MSOC}$  for (a-b) BFS and (c-d) CP smouldering and flaming emissions. Here we have compared  $MAC_{MSOC}$  of fresh emission (black) with photochemically (yellow for smouldering, orange for flaming) and dark aged emission (light red for smouldering and dark red for flaming) in the chamber. Straight line denotes the mean of replicates, while the shaded areas highlight the standard deviation of mean.**

**Table S1:** Origins and compositions of the biomasses used in the experiments

| <b>Fuel</b>                    | <b>Origin<br/>(longitude/latitude)</b>       | <b>moistur<br/>e (%)</b> | <b>composition<br/>information<br/>(C/N/S/H) %</b> | <b>sampl<br/>e mass<br/>(g)</b> |                             |
|--------------------------------|----------------------------------------------|--------------------------|----------------------------------------------------|---------------------------------|-----------------------------|
| Boreal Forest<br>Surface (BFS) | 62.485098"N,<br>27.491264"E<br>(Kiviniemi)   | 8.2-16.1                 | 50.5/1.19/0.11/5.4<br>5                            | 155-<br>550                     | Extra<br>litter 10-<br>24 g |
| Commercial Peat<br>(CP)        | ??                                           | 9.7                      | 57/1.92/0.2/5.8                                    | 50                              |                             |
| Finnish Peatland<br>(FIA)      | 61°47'21.6"N,<br>24°18'35.9"E<br>(Lakkasuo)  | -                        | 46.5/-/-/-                                         | 50                              |                             |
| Finnish Peatland<br>(FIB)      | 61°49'28.0"N,<br>24°08'25.8"E<br>(Siikaneva) | -                        | 47.6/-/-/-                                         | 50                              |                             |
| Norwegian Peatland<br>(NOR)    | 78°13'00.0"N,<br>13°45'00.0"E<br>(Svalbard)  | -                        | 27.9/1.85/-/-                                      | 50                              |                             |
| Russian Peatland<br>(RUS)      | 66°33'10.2"N,<br>60°37'57"E<br>(Rogovaya)    | -                        | 51.7/2.9/-/-                                       | 50                              |                             |
| Savanna Wood<br>(SW)           | 26°34'12"S,<br>26°56'24"E<br>(South Africa)  | 9.4                      | 48.8/0.88/0.05/5.6                                 | 60                              |                             |
| Savanna Grass (SG)             | 26°34'12"S,<br>26°56'24"E                    | 8.6                      | 43/0.94/0.10/5.1                                   | 50                              |                             |



**Table S2.** Components measured by the FTIR and the grouping for the gaseous organic compounds

| <i>Component</i>               | <i>Formula</i>                               | <i>Calibration range</i> | <i>Unit</i> | <i>VOC group</i>        |
|--------------------------------|----------------------------------------------|--------------------------|-------------|-------------------------|
| Water vapor                    | H <sub>2</sub> O                             | 20                       | %           |                         |
| Carbon dioxide                 | CO <sub>2</sub>                              | 25                       | %           |                         |
| Carbon monoxide                | CO                                           | 5000                     | ppm         |                         |
|                                | CO                                           | 10000                    | ppm         |                         |
| Nitrous oxide                  | N <sub>2</sub> O                             | 200                      | ppm         |                         |
| Nitrogen monoxide              | NO                                           | 1000                     | ppm         |                         |
| Nitrogen dioxide               | NO <sub>2</sub>                              | 200                      | ppm         |                         |
| Sulfur dioxide                 | SO <sub>2</sub>                              | 1000                     | ppm         |                         |
| Carbonyl sulfide               | COS                                          | 100                      | ppm         |                         |
| Ammonia                        | NH <sub>3</sub>                              | 500                      | ppm         |                         |
| Hydrogen chloride              | HCl                                          | 200                      | ppm         |                         |
| Hydrogen cyanide               | HCN                                          | 100                      | ppm         |                         |
| Hydrogen fluoride              | HF                                           | 100                      | ppm         |                         |
| Oxygen                         | O <sub>2</sub>                               | 25                       | %           |                         |
| Methane                        | CH <sub>4</sub>                              | 1000                     | ppm         | Methane                 |
| Ethane                         | C <sub>2</sub> H <sub>6</sub>                | 100                      | ppm         | Aliphatic hydrocarbon   |
| Propane                        | C <sub>3</sub> H <sub>8</sub>                | 100                      | ppm         | Aliphatic hydrocarbon   |
| Butane                         | C <sub>4</sub> H <sub>10</sub>               | 100                      | ppm         | Aliphatic hydrocarbon   |
| Pentane                        | C <sub>5</sub> H <sub>12</sub>               | 100                      | ppm         | Aliphatic hydrocarbon   |
| Hexane                         | C <sub>6</sub> H <sub>14</sub>               | 100                      | ppm         | Aliphatic hydrocarbon   |
| Heptane                        | C <sub>7</sub> H <sub>16</sub>               | 100                      | ppm         | Aliphatic hydrocarbon   |
| Octane                         | C <sub>8</sub> H <sub>18</sub>               | 100                      | ppm         | Aliphatic hydrocarbon   |
| Acetylene                      | C <sub>2</sub> H <sub>2</sub>                | 500                      | ppm         | Aliphatic hydrocarbon   |
| Ethylene                       | C <sub>2</sub> H <sub>4</sub>                | 500                      | ppm         | Aliphatic hydrocarbon   |
| Propene                        | C <sub>3</sub> H <sub>6</sub>                | 500                      | ppm         | Aliphatic hydrocarbon   |
| 1,3-Butadiene                  | C <sub>4</sub> H <sub>6</sub>                | 500                      | ppm         | Aliphatic hydrocarbon   |
| Benzene                        | C <sub>6</sub> H <sub>6</sub>                | 500                      | ppm         | Aromatic                |
| Toluene                        | C <sub>7</sub> H <sub>8</sub>                | 100                      | ppm         | Aromatic                |
| m-Xylene                       | C <sub>8</sub> H <sub>10</sub>               | 100                      | ppm         | Aromatic                |
| o-Xylene                       | C <sub>8</sub> H <sub>10</sub>               | 200                      | ppm         | Aromatic                |
| p-Xylene                       | C <sub>8</sub> H <sub>10</sub>               | 100                      | ppm         | Aromatic                |
| 1,2,3-Trimethylbenzene         | C <sub>9</sub> H <sub>12</sub>               | 100                      | ppm         | Aromatic                |
| 1,2,4-Trimethylbenzene         | C <sub>9</sub> H <sub>12</sub>               | 100                      | ppm         | Aromatic                |
| 1,3,5-Trimethylbenzene         | C <sub>9</sub> H <sub>12</sub>               | 100                      | ppm         | Aromatic                |
| Phenol                         | C <sub>6</sub> H <sub>6</sub> O              | 200                      | ppm         | Aromatic                |
| Furan                          | C <sub>4</sub> H <sub>4</sub> O              | 200                      | ppm         | Aromatic                |
| Furfural                       | C <sub>5</sub> H <sub>4</sub> O <sub>2</sub> | 200                      | ppm         | Aromatic                |
| Formic acid                    | CH <sub>2</sub> O                            | 100                      | ppm         | Non-aromatic oxygenated |
| Acetic acid                    | C <sub>2</sub> H <sub>4</sub> O <sub>2</sub> | 200                      | ppm         | Non-aromatic oxygenated |
| Formaldehyde                   | CHOH                                         | 500                      | ppm         | Non-aromatic oxygenated |
| Acetaldehyde                   | C <sub>2</sub> H <sub>4</sub> O              | 100                      | ppm         | Non-aromatic oxygenated |
| Methanol                       | CH <sub>4</sub> O                            | 200                      | ppm         | Non-aromatic oxygenated |
| Ethanol                        | C <sub>2</sub> H <sub>6</sub> O              | 200                      | ppm         | Non-aromatic oxygenated |
| Propanol                       | C <sub>3</sub> H <sub>8</sub> O              | 100                      | ppm         | Non-aromatic oxygenated |
| Methyl tert-butyl ether (MTBE) | C <sub>5</sub> H <sub>12</sub> O             | 100                      | ppm         | Non-aromatic oxygenated |

**Table S3: Relative abundance of different OC fractions and EC in fresh emission and diluted primary and aged emissions in teflon chamber**

| BFS  |      |      | CP   |      |      |      |      |      | Fuel       |                                      |
|------|------|------|------|------|------|------|------|------|------------|--------------------------------------|
| 2c   | 2b   | 2a   | 1f   | 1e   | 1d   | 1c   | 1b   | 1a   | Experiment |                                      |
| 20.3 | 24.6 | 23.8 | 21.6 | 21.8 | 22.3 | 8.73 | 20.8 | 19.7 | OC1        | fresh emission (% of total)          |
| 25.7 | 26.2 | 27.7 | 26.9 | 27.0 | 26.5 | 11.0 | 22.2 | 24.5 | OC2        |                                      |
| 26.7 | 27.7 | 26.3 | 29.9 | 31.6 | 29.8 | 14.1 | 25.7 | 30.4 | OC3        |                                      |
| 4.62 | 5.39 | 4.32 | 6.21 | 6.39 | 6.54 | 4.38 | 5.0  | 5.95 | OC4        |                                      |
| 3.55 | 4.75 | 4.39 | 14.7 | 12.6 | 14.3 | 5.27 | 8.67 | 13.9 | PC         |                                      |
| 19.1 | 11.4 | 13.5 | 0.66 | 0.65 | 0.47 | 56.5 | 17.7 | 5.54 | EC         | chamber diluted primary (% of total) |
| 8.03 |      |      | 9.8  |      |      | 5.70 |      |      | OC1        |                                      |
| 13.4 |      |      | 14.5 |      |      | 10.6 |      |      | OC2        |                                      |
| 33.4 |      |      | 36.3 |      |      | 28.1 |      |      | OC3        |                                      |
| 12.3 |      |      | 12.1 |      |      | 11.6 |      |      | OC4        |                                      |
| 0.42 |      |      | 27.3 |      |      | 4.70 |      |      | PC         | photo aged in chamber (% of total)   |
| 32.4 |      |      | 0.01 |      |      | 39.3 |      |      | EC         |                                      |
|      |      | 6.85 |      |      | 6.07 |      |      | 5.15 | OC1        |                                      |
|      |      | 14.0 |      |      | 13.9 |      |      | 9.40 | OC2        |                                      |
|      |      | 34.2 |      |      | 40.1 |      |      | 35.5 | OC3        |                                      |
|      |      | 12.8 |      |      | 12.1 |      |      | 13.0 | OC4        | dark aged in chamber (% of total)    |
|      |      | 13.0 |      |      | 27.8 |      |      | 34.8 | PC         |                                      |
|      |      | 19.1 |      |      | 0.03 |      |      | 2.15 | EC         |                                      |
|      | 7.92 |      |      | 7.46 |      |      | 7.50 |      | OC1        |                                      |
|      | 13.4 |      |      | 14.6 |      |      | 12.5 |      | OC2        |                                      |
|      | 33.5 |      |      | 35.8 |      |      | 29.9 |      | OC3        |                                      |
|      | 12.6 |      |      | 12.1 |      |      | 12.6 |      | OC4        |                                      |
|      | 13.7 |      |      | 30.0 |      |      | 26.2 |      | PC         |                                      |
|      | 18.8 |      |      | 0.01 |      |      | 11.3 |      | EC         |                                      |

| SG   |      | SW   |      |      |      | BFS  |      |      | Fuel                                 |
|------|------|------|------|------|------|------|------|------|--------------------------------------|
| 4b   | 4a   | 3d   | 3c   | 3b   | 3a   | 2f   | 2e   | 2d   | Experiment                           |
| 27.7 | 35.0 | 29.2 | 27.0 | 26.8 | 24.7 | 19.1 | 23.1 | 27.5 | fresh emission (% of total)          |
| 26.1 | 24.7 | 24.6 | 26.1 | 23.0 | 21.6 | 27.5 | 30.6 | 28.1 |                                      |
| 24.1 | 20.6 | 22.9 | 26.3 | 27.3 | 24.4 | 29.5 | 31.5 | 28.2 |                                      |
| 5.00 | 5.30 | 6.20 | 6.70 | 6.80 | 7.1  | 6.34 | 5.40 | 5.10 |                                      |
| 8.20 | 8.40 | 11.4 | 8.40 | 7.00 | 11.5 | 15.7 | 9.00 | 10.4 |                                      |
| 8.90 | 6.0  | 5.65 | 5.60 | 9.10 | 10.7 | 1.86 | 0.40 | 0.70 | EC                                   |
|      |      |      |      |      |      | 12.1 |      |      | chamber diluted primary (% of total) |
|      |      |      |      |      |      | 14.3 |      |      |                                      |
|      |      |      |      |      |      | 37.0 |      |      |                                      |
|      |      |      |      |      |      | 10.8 |      |      |                                      |
|      |      |      |      |      |      | 20.7 |      |      |                                      |
|      |      |      |      |      |      | 5.10 |      |      | EC                                   |
|      | 6.90 |      | 5.20 |      | 13.0 |      |      | 4.73 | photo aged in chamber (% of total)   |
|      | 14.4 |      | 13.6 |      | 20.8 |      |      | 12.1 |                                      |
|      | 34.0 |      | 37.0 |      | 28.2 |      |      | 41.4 |                                      |
|      | 13.1 |      | 14.0 |      | 9.30 |      |      | 14.6 |                                      |
|      | 31.6 |      | 30.2 |      | 16.0 |      |      | 27.2 |                                      |
|      | 0.01 |      | 0.01 |      | 12.7 |      |      | 0.01 | EC                                   |
| 9.21 |      | 9.2  |      | 8.90 |      |      | 8.80 |      | dark aged in chamber (% of total)    |
| 16.7 |      | 16.1 |      | 16.5 |      |      | 13.2 |      |                                      |
| 29.8 |      | 34.5 |      | 36.4 |      |      | 38.0 |      |                                      |
| 10.7 |      | 9.1  |      | 9.50 |      |      | 14.2 |      |                                      |
| 12.6 |      | 14.0 |      | 25.1 |      |      | 22.2 |      |                                      |
| 20.9 |      | 17.1 |      | 3.60 |      |      | 3.50 |      | EC                                   |

| SG   |      | Fuel       |                                         |
|------|------|------------|-----------------------------------------|
| 4d   | 4c   | Experiment |                                         |
| 27.3 | 31.6 | OC1        | fresh emission<br>( % of total)         |
| 26.2 | 27.1 | OC2        |                                         |
| 26.5 | 25.0 | OC3        |                                         |
| 4.80 | 4.20 | OC4        |                                         |
| 9.60 | 8.50 | PC         |                                         |
| 5.60 | 3.60 | EC         |                                         |
|      |      | OC1        | chamber diluted<br>primary (% of total) |
|      |      | OC2        |                                         |
|      |      | OC3        |                                         |
|      |      | OC4        |                                         |
|      |      | PC         |                                         |
|      |      | EC         |                                         |
|      | 5.42 | OC1        | photo aged in chamber<br>(% of total)   |
|      | 8.97 | OC2        |                                         |
|      | 18.7 | OC3        |                                         |
|      | 8.22 | OC4        |                                         |
|      | 17.5 | PC         |                                         |
|      | 41.2 | EC         |                                         |
| 10.9 |      | OC1        | dark aged in chamber<br>(% of total)    |
| 15.8 |      | OC2        |                                         |
| 30.4 |      | OC3        |                                         |
| 10.3 |      | OC4        |                                         |
| 27.2 |      | PC         |                                         |
| 5.40 |      | EC         |                                         |

**Table S4: MAC<sub>k</sub> in fresh and chamber aged BB emissions along with effective density of bulk BB aerosol (mean ± standard deviation)**

| 2b                                 | 2a                 | 1f                          | 1e                     | 1d                     | 1c                 | 1b                    | 1a                 | No.                                                            |
|------------------------------------|--------------------|-----------------------------|------------------------|------------------------|--------------------|-----------------------|--------------------|----------------------------------------------------------------|
| <b>Boreal forest surface (BFS)</b> |                    | <b>Commercial Peat (CP)</b> |                        |                        |                    |                       |                    | <b>Fuel</b>                                                    |
| flaming<br>(n = 3 )                | flaming<br>(n = 3) | smouldering<br>(n = 1)      | smouldering<br>(n = 1) | smouldering<br>(n = 2) | flaming<br>(n = 1) | Flaming<br>(n = 1)    | flaming<br>(n = 2) | Combustion Condition<br>(no. of replicates)                    |
| 0.75 ± 0.04                        | 0.71 ± 0.15        | 0.78                        | NaN                    | 0.76 ± 0.02            | NaN                | 1.31                  | 1.32 ± 0.16        | MAC <sub>365_MSO</sub>                                         |
| 0.004 ± 0.000                      | 0.004 ± 0.001      | 0.004                       | NaN                    | 0.004 ± 0.00           | NaN                | 0.007                 | 0.007±0.001        | k <sub>550_MSO</sub> (fresh emission)                          |
| 0.88 ± 0.36                        | 0.69 ± 0.13        | 1.43                        | NaN                    | 1.45 ± 0.32            | NaN                | 0.78                  | 1.59 ± 0.14        | MAC <sub>365_WSO</sub> (m <sup>2</sup> /g)<br>(fresh emission) |
| 0.006 ± 0.003                      | 0.004 ± 0.001      | 0.011                       | NaN                    | 0.010 ± 0.002          | NaN                | 0.007                 | 0.012 ± 0.001      | k <sub>550_WSO</sub> (fresh emission)                          |
| 1.20 ± 0.05                        | 1.20 ± 0.05        | NaN                         | 1.10                   | 1.00 ± 0.02            | NA                 | 1.10                  | NA                 | density (g/cm <sup>3</sup> ) (chamber                          |
| high NOx dark<br>aged              | photo aged         | no aging                    | high NOx<br>dark aged  | photo aged             | no aging           | high NOx<br>dark aged | photo aged         | Aging condition (in chamber)                                   |
| 2.21 ± 1.23                        | 0.71 ± 0.22        | 0.61                        | 1.29                   | 1.56 ± 0.69            | NaN                | 1.75                  | 0.65 ± 0.07        | MAC <sub>365_MSO</sub> (m <sup>2</sup> /g)<br>(chamber aged)   |
| 0.014 ± 0.009                      | 0.003 ± 0.001      | 0.003                       | 0.007                  | 0.009 ± 0.005          | sNaN               | 0.01                  | 0.003±0.002        | k <sub>550_MSO</sub> (chamber aged)                            |
| 0.82 ± 0.08                        | 0.75 ± 0.12        | 0.34                        | 0.77                   | 0.48 ± 0.011           | NaN                | 0.62                  | 1.49 ± 0.27        | MAC <sub>365_WSO</sub> (m <sup>2</sup> /g)<br>(chamber aged)   |
| 0.004 ± 0.003                      | 0.002±0.001        | 0.002                       | 0.005                  | 0.002 ± 0.000          | NaN                | 0.003                 | 0.0078±0.001       | k <sub>550_WSO</sub> (chamber aged)                            |
| 1.30 ± 0.07                        | 1.30 ± 0.09        | NA                          | 1.10                   | 1.20 ± 0.03            | NaN                | 1.10                  | 1.30 ± 0.05        | density (g/cm <sup>3</sup> ) (chamber aged)                    |

| 4d                     | 4c                     | 4b                   | 4a                 | 3d                     | 3c                     | 3b                   | 3a                 | 2f                          | 2e                     | 2d                     | 2c                 |
|------------------------|------------------------|----------------------|--------------------|------------------------|------------------------|----------------------|--------------------|-----------------------------|------------------------|------------------------|--------------------|
| Savanna grass (SG)     |                        |                      |                    | Savanna wood (SW)      |                        |                      |                    | Boreal forest surface (BFS) |                        |                        |                    |
| smouldering<br>(n = 1) | smouldering<br>(n = 1) | flaming<br>(n = 1)   | flaming<br>(n = 1) | smouldering<br>(n = 1) | smouldering<br>(n = 1) | flaming<br>(n = 1)   | flaming<br>(n = 1) | smouldering<br>(n = 1)      | smouldering<br>(n = 3) | smouldering<br>(n = 3) | flaming<br>(n = 1) |
| 0.68                   | 0.94                   | 0.93                 | 0.89               | 1.05                   | 1.11                   | 1.06                 | 1.38               | 0.58                        | 0.48 ± 0.05            | 0.62 ± 0.11            | 0.95               |
| 0.005                  | 0.012                  | 0.009                | 0.009              | 0.008                  | 0.009                  | 0.009                | 0.011              | 0.003                       | 0.002 ± 0.005          | 0.003 ± 0.001          | 0.005              |
| 1.18                   | 0.84                   | 0.94                 | 1.22               | 0.85                   | 1.03                   | 1.08                 | 1.28               | 0.92                        | 0.78 ± 0.11            | 1.17 ± 0.26            | 0.65               |
| 0.011                  | 0.006                  | 0.008                | 0.01               | 0.007                  | 0.007                  | 0.008                | 0.009              | 0.006                       | 0.005 ± 0.001          | 0.006 ± 0.002          | 0.004              |
| 1.60                   | 1.70                   | 1.70                 | 1.80               | 1.40                   | NA                     | 1.50                 | 1.40               | 1.20                        | 1.10 ± 0.03            | 1.20 ± 0.1             | NaN                |
| low NOx<br>dark aged   | photo aged             | low NOx<br>dark aged | photo aged         | low NOx<br>dark aged   | photo aged             | low NOx<br>dark aged | photo aged         | no aging                    | high NOx<br>dark aged  | photo aged             | no aging           |
| 1.32                   | NaN                    | 1.21                 | 1.35               | 0.73                   | 0.68                   | NaN                  | 1.06               | 0.64                        | 0.65 ± 0.11            | 0.50 ± 0.06            | NaN                |
| 0.01                   | NaN                    | 0.01                 | 0.005              | 0.006                  | 0.004                  | NaN                  | 0.007              | 0.022                       | 0.003 ± 0.001          | 0.002 ± 0.000          | NaN                |
| 0.83                   | 2.10                   | 1.56                 | 3.43               | 0.86                   | 0.40                   | 1.22                 | 1.03               | 0.31                        | 0.60 ± 0.04            | 0.26 ± 0.04            | NaN                |
| 0.005                  | 0.010                  | 0.008                | 0.012              | 0.005                  | 0.001                  | 0.007                | 0.003              | 0.002                       | 0.002 ± 0.001          | 0.001 ± 0.000          | NaN                |
| 1.50                   | 1.40                   | 1.50                 | 1.60               | 1.40                   | 1.40                   | 1.30                 | 1.40               | 1.20                        | 1.10 ± 0.03            | 1.30 ± 0.05            | NaN                |

## References:

1. Schneider, E., Rüger, C. P., Chacón-Patiño, M. L., Somero, M., Ruppel, M. M., Ihalainen, M., Köster, K., Sippula, O., Czech, H., & Zimmermann, R. (2024a). The complex composition of organic aerosols emitted during burning varies between Arctic and boreal peat. *Communications Earth and Environment*, 5(1).  
<https://doi.org/10.1038/s43247-024-01304-y>
